# Supplementary material
Source: Springer Nature journal article supplement (https://www.springerprofessional.de/resource/supplementary/13677_2012_13_MOESM4_ESM.pdf/10743464)

# Agent Management Platform

Virtual Machine

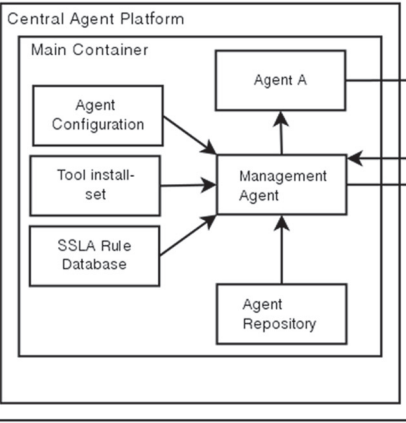

Virtual Machine

# Webserver VM

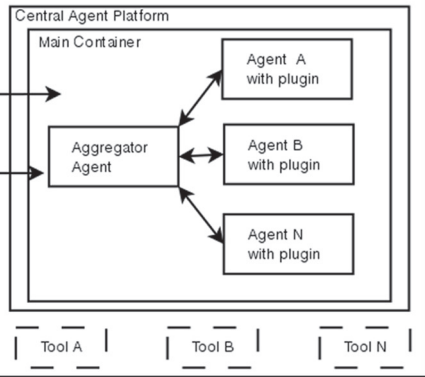

MoveToLocation()

ConnectionForManagement / Information / Reaction ()

ConnectionForManagement / Information ()

Virtual Machine

# Database VM

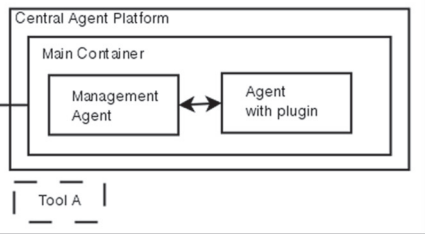

Supplement: MOESM4 [file 10743464]
